# Supplementary material for: Genomic and Biochemical Characterization of Bifidobacterium pseudocatenulatum JCLA3 Isolated from Human Intestine
Source: MDPI journal article supplement (doi:10.3390/microorganisms10112100), 2022-10-22
Supplement: s1 [file s1]

**Supplementary Materials:**

**Table S1:** *Bifidobacterium pseudocatenulatum* encoded enzymes.

| Class                  | Subclasses                                                 | EC      | Number of enzymes found |
|------------------------|------------------------------------------------------------|---------|-------------------------|
| <b>Transferases</b>    | Transfer one carbon group                                  | 2.1     | 26                      |
|                        | transfer aldehyde or ketonic groups                        | 2.2     | 5                       |
|                        | acyltransferases                                           | 2.3     | 21                      |
|                        | glycosyltransferases                                       | 2.4     | 22                      |
|                        | transferring alkyl or aryl groups other than methyl groups | 2.5     | 14                      |
|                        | transferring nitrogenous groups                            | 2.6     | 10                      |
|                        | transferring phosphorus-containing groups                  | 2.7     | 82                      |
|                        | transferring sulfur-containing groups                      | 2.8     | 4                       |
| <b>Hydrolases</b>      | acting on ester bonds                                      | 3.1     | 44                      |
|                        | Glycosylases                                               | 3.2     | 46                      |
|                        | Peptidases                                                 | 3.4     | 32                      |
|                        | acting on carbon-nitrogen bonds, other than peptide bonds  | 3.5     | 23                      |
|                        | acting on acid anhydrides                                  | 3.6     | 32                      |
|                        | acting on halide bonds                                     | EC      | 1                       |
|                        |                                                            | 3.8.1.2 |                         |
| <b>Oxidoreductases</b> | acting on the CH-OH group of donors                        | 1.1     | 29                      |
|                        | aldehyde or oxo group of donors                            | 1.2     | 5                       |
|                        | acting on the CH-CH group of donors                        | 1.3     | 6                       |
|                        | acting on the CH-NH <sub>2</sub> group of donors           | 1.4     | 3                       |
|                        | acting on the CH-NH group of donors                        | 1.5     | 5                       |
|                        | acting on NADH or NADPH                                    | 1.6     | 3                       |
|                        | acting on a sulfur group of donors                         | 1.8     | 3                       |
|                        | acting on diphenols and related substances as donors       | 1.10    | 1                       |
|                        | acting on a peroxide as acceptor                           | 1.11    | 2                       |
|                        | acting on CH or CH <sub>2</sub> groups                     | 1.17    | 5                       |
|                        | acting on iron-sulfur proteins as donors                   | 1.18    | 1                       |
|                        | acting on phosphorus or arsenic in donors                  | 1.20    | 2                       |
|                        | other oxidoreductases                                      | 1.97    | 2                       |
| <b>Ligases</b>         | forming carbon-oxygen bonds                                | 6.1     | 20                      |
|                        | forming carbon-sulfur bonds                                | 6.2     | 6                       |
|                        | forming carbon-nitrogen bonds                              | 6.3     | 35                      |
|                        | forming carbon-carbon bonds                                | 6.4     | 2                       |
|                        | forming phosphoric-ester bonds                             | 6.5     | 1                       |
| <b>Lyases</b>          | carbon-carbon lyases                                       | 4.1     | 13                      |
|                        | carbon-oxygen lyases                                       | 4.2     | 19                      |
|                        | carbon-nitrogen lyases                                     | 4.3     | 9                       |

|                     |                                                                  |     |    |
|---------------------|------------------------------------------------------------------|-----|----|
| <b>Isomerases</b>   | carbon-sulfur lyases                                             | 4.4 | 4  |
|                     | phosphorus-oxygen lyases                                         | 4.6 | 2  |
|                     | Racemases and epimerases                                         | 5.1 | 9  |
|                     | cis-trans-Isomerases                                             | 5.2 | 1  |
|                     | intramolecular oxidoreductases                                   | 5.3 | 8  |
|                     | intramolecular transferases                                      | 5.4 | 13 |
|                     | intramolecular lyases                                            | 5.5 | 1  |
|                     | isomerases altering macromolecular conformation                  | 5.6 | 6  |
| <b>Translocases</b> | Catalyzing the translocation of hydrons                          | 7.1 | 2  |
|                     | catalyzing the translocation of inorganic cations                | 7.2 | 3  |
|                     | Catalyzing the translocation of inorganic anions and it chelates | 7.3 | 1  |
|                     | catalyzing the translocation of amino acids and peptides         | 7.4 | 7  |
|                     | translocation of carbohydrates and their derivatives             | 7.5 | 2  |
|                     | translocation of other compounds                                 | 7.6 | 3  |

**Table S2:** *Bifidobacterium pseudocatenulatum*'s genes associated with carbohydrate metabolism, their respective enzymes, and the possible pathway in which they play a role according to the KEGG database.

| <i>B. pseudocatenulatum</i><br>JCLA3 locus_tag | Gene_Bif_KEGG | Protein name                    | Pathway                                                                                                                       |
|------------------------------------------------|---------------|---------------------------------|-------------------------------------------------------------------------------------------------------------------------------|
| L0J99_00020                                    | BBPC_1812     | alpha-galactosidase             | Galactose metabolism<br>Glycerolipid metabolism<br>Sphingolipid metabolism                                                    |
| L0J99_00060                                    | BBPC_1818     | glycosyl hydrolase              | Starch and sucrose metabolism<br>Cyanoamino acid metabolism                                                                   |
| L0J99_00240                                    | BBPC_0011     | L-lactate dehydrogenase         | Glycolysis / Gluconeogenesis<br>Pyruvate metabolism<br>Propanoate metabolism<br>Cysteine and methionine metabolism<br>Exosome |
| L0J99_00255                                    | BBPC_0015     | phosphoenolpyruvate carboxylase | Pyruvate metabolism<br>Methane metabolism                                                                                     |
| L0J99_00285                                    | BBPC_0021     | glycogen phosphorylase          | Starch and sucrose metabolism                                                                                                 |

|             |           |                                               |                                                                                                                    |
|-------------|-----------|-----------------------------------------------|--------------------------------------------------------------------------------------------------------------------|
| L0J99_00450 | BBPC_0057 | fructose-bisphosphate aldolase                | Glycolysis / Gluconeogenesis<br>Pentose phosphate pathway<br>Fructose and mannose metabolism<br>Methane metabolism |
| L0J99_00480 | BBPC_0063 | sucrose phosphorylase                         | Starch and sucrose metabolism                                                                                      |
| L0J99_01450 | BBPC_0270 | glycosyl hydrolase                            | Starch and sucrose metabolism                                                                                      |
| L0J99_01750 | BBPC_0326 | 4-alpha-glucanotransferase                    | Starch and sucrose metabolism                                                                                      |
| L0J99_01765 | BBPC_0329 | glycosyl hydrolase                            | Starch and sucrose metabolism                                                                                      |
| L0J99_03885 | BBPC_0749 | glycosyl hydrolase                            | Starch and sucrose metabolism                                                                                      |
| L0J99_04125 | BBPC_0806 | Pullulanase                                   | Starch and sucrose metabolism                                                                                      |
| L0J99_08150 | BBPC_1479 | glycoside hydrolase                           | Starch and sucrose metabolism                                                                                      |
| L0J99_08195 | BBPC_1479 | glycoside hydrolase                           | Starch and sucrose metabolism                                                                                      |
| L0J99_09820 | BBPC_1721 | putative pullulanase                          | Starch and sucrose metabolism                                                                                      |
| L0J99_09845 | BBPC_1726 | 4-alpha-glucanotransferase                    | Starch and sucrose metabolism                                                                                      |
| L0J99_00490 | BBPC_0065 | glycosyl hydrolase                            | Galactose metabolism<br>Starch and sucrose metabolism                                                              |
| L0J99_00880 | BBPC_0155 | 2-isopropylmalate synthase                    | Pyruvate metabolism<br>Valine, leucine, and isoleucine biosynthesis                                                |
| L0J99_00935 | BBPC_0166 | myo-inositol-1-phosphate synthase             | Inositol phosphate metabolism                                                                                      |
| L0J99_01065 | BBPC_0188 | isopropylmalate isomerase large subunit       | C5-Branched dibasic acid metabolism<br>Valine, leucine, and isoleucine biosynthesis                                |
| L0J99_01070 | BBPC_0189 | isopropylmalate isomerase small subunit       | C5-Branched dibasic acid metabolism<br>Valine, leucine, and isoleucine biosynthesis                                |
| L0J99_01130 | BBPC_0207 | 6-phosphogluconate dehydrogenase-like protein | Pentose phosphate pathway<br>Glutathione metabolism                                                                |
| L0J99_01140 | BBPC_0209 | carbohydrate kinase                           | Pentose phosphate pathway                                                                                          |

|             |           |                                     |                                                                                                                                                                                                      |
|-------------|-----------|-------------------------------------|------------------------------------------------------------------------------------------------------------------------------------------------------------------------------------------------------|
| L0J99_01225 | BBPC_0226 | acetolactate synthase small subunit | Butanoate metabolism<br>C5-Branched dibasic acid metabolism<br>Valine, leucine, and isoleucine biosynthesis<br>Pantothenate and CoA biosynthesis                                                     |
| L0J99_01230 | BBPC_0227 | acetolactate synthase large subunit | Butanoate metabolism<br>C5-Branched dibasic acid metabolism<br>Valine, leucine, and isoleucine biosynthesis<br>Pantothenate and CoA biosynthesis                                                     |
| L0J99_01315 | BBPC_0244 | glucose-6-phosphate isomerase       | Glycolysis / Gluconeogenesis<br>Pentose phosphate pathway<br>Starch and sucrose metabolism<br>Amino sugar and nucleotide sugar metabolism                                                            |
| L0J99_01430 | BBPC_0266 | propionyl-CoA carboxylase subunit   | alpha<br>Pyruvate metabolism<br>Glyoxylate and dicarboxylate metabolism<br>Propanoate metabolism<br>Fatty acid biosynthesis<br>Valine, leucine, and isoleucine degradation                           |
| L0J99_01435 | BBPC_0267 | propionyl-CoA carboxylase subunit   | beta<br>Glyoxylate and dicarboxylate metabolism<br>Propanoate metabolism<br>Valine, leucine, and isoleucine degradation                                                                              |
| L0J99_01770 | BBPC_0330 | Lyase                               | Pyruvate metabolism                                                                                                                                                                                  |
| L0J99_01785 | BBPC_0333 | dehydrogenase                       | Pentose and glucuronate interconversions                                                                                                                                                             |
| L0J99_01795 | BBPC_0335 | aldehyde-alcohol dehydrogenase      | Glycolysis / Gluconeogenesis<br>Pyruvate metabolism<br>Butanoate metabolism<br>Fatty acid degradation<br>Tyrosine metabolism<br>Chloroalkane and chloroalkene degradation<br>Naphthalene degradation |
| L0J99_02000 | BBPC_0376 | ribose-5-phosphate isomerase        | Pentose phosphate pathway                                                                                                                                                                            |

|             |           |                                             |                                                                                                                                                                                        |
|-------------|-----------|---------------------------------------------|----------------------------------------------------------------------------------------------------------------------------------------------------------------------------------------|
| L0J99_02020 | BBPC_0380 | phosphoglucomutase                          | Glycolysis / Gluconeogenesis<br>Pentose phosphate pathway<br>Galactose metabolism<br>Starch and sucrose metabolism<br>Amino sugar and nucleotide sugar metabolism<br>Purine metabolism |
| L0J99_02025 | BBPC_0381 | PTS system glucose-specific components      | Phosphotransferase system (PTS)<br>Transporters                                                                                                                                        |
| L0J99_02120 | BBPC_0405 | Phosphoglyceromutase                        | Glycolysis / Gluconeogenesis<br>Methane metabolism<br>Glycine, serine, and threonine metabolism<br>Membrane trafficking                                                                |
| L0J99_02275 | BBPC_0429 | putative oxidoreductase                     | Glyoxylate and dicarboxylate metabolism<br>Propanoate metabolism                                                                                                                       |
| L0J99_02410 | BBPC_0457 | xylulose kinase                             | Pentose and glucuronate interconversions                                                                                                                                               |
| L0J99_02525 | BBPC_0457 | xylulose kinase                             | Pentose and glucuronate interconversions                                                                                                                                               |
| L0J99_02410 | BBPC_0475 | xylulose kinase                             | Pentose and glucuronate interconversions                                                                                                                                               |
| L0J99_02525 | BBPC_0475 | xylulose kinase                             | Pentose and glucuronate interconversions                                                                                                                                               |
| L0J99_02450 | BBPC_0466 | xylose isomerase                            | Pentose and glucuronate interconversions<br>Fructose and mannose metabolism                                                                                                            |
| L0J99_01695 | BBPC_0315 | beta-1                                      | Amino sugar and nucleotide sugar metabolism                                                                                                                                            |
| L0J99_02380 | BBPC_0315 | beta-1                                      | Amino sugar and nucleotide sugar metabolism                                                                                                                                            |
| L0J99_02480 | BBPC_0315 | beta-1                                      | Amino sugar and nucleotide sugar metabolism                                                                                                                                            |
| L0J99_02455 | BBPC_0467 | glycosyl hydrolase                          | Amino sugar and nucleotide sugar metabolism                                                                                                                                            |
| L0J99_01695 | BBPC_0472 | beta-1                                      | Amino sugar and nucleotide sugar metabolism                                                                                                                                            |
| L0J99_02380 | BBPC_0472 | beta-1                                      | Amino sugar and nucleotide sugar metabolism                                                                                                                                            |
| L0J99_02480 | BBPC_0472 | beta-1                                      | Amino sugar and nucleotide sugar metabolism                                                                                                                                            |
| L0J99_09635 | BBPC_1686 | N-acetylglucosamine-6-phosphate deacetylase | Amino sugar and nucleotide sugar metabolism                                                                                                                                            |

|             |           |                                              |                                                                                                                                                                              |
|-------------|-----------|----------------------------------------------|------------------------------------------------------------------------------------------------------------------------------------------------------------------------------|
| L0J99_09640 | BBPC_1687 | glucosamine-6-phosphate deaminase            | Amino sugar and nucleotide sugar metabolism                                                                                                                                  |
| L0J99_02630 | BBPC_0495 | citrate synthase                             | Citrate cycle (TCA cycle)<br>Glyoxylate and dicarboxylate metabolism                                                                                                         |
| L0J99_02695 | BBPC_0509 | D-fructose-6-phosphate amido transferase     | Amino sugar and nucleotide sugar metabolism<br>Alanine, aspartate, and glutamate metabolism<br>Peptidases and inhibitors                                                     |
| L0J99_02710 | BBPC_0515 | beta-galactosidase                           | Galactose metabolism                                                                                                                                                         |
| L0J99_02970 | BBPC_0568 | alcohol dehydrogenase                        | Glycolysis / Gluconeogenesis<br>Pyruvate metabolism<br>Fatty acid degradation<br>Tyrosine metabolism<br>Chloroalkane and chloroalkene degradation<br>Naphthalene degradation |
| L0J99_03140 | BBPC_0601 | putative inositol monophosphatase            | Inositol phosphate metabolism                                                                                                                                                |
| L0J99_03440 | BBPC_0660 | succinate dehydrogenase iron-sulfur subunit  | Citrate cycle (TCA cycle)<br>Butanoate metabolism<br>Oxidative phosphorylation                                                                                               |
| L0J99_03445 | BBPC_0661 | succinate dehydrogenase flavoprotein subunit | Citrate cycle (TCA cycle)<br>Butanoate metabolism<br>Oxidative phosphorylation                                                                                               |
| L0J99_03675 | BBPC_0707 | 6-phosphogluconate dehydrogenase             | Pentose phosphate pathway<br>Glutathione metabolism                                                                                                                          |
| L0J99_03695 | BBPC_0710 | glucose-6-phosphate 1-dehydrogenase          | Pentose phosphate pathway<br>Glutathione metabolism                                                                                                                          |
| L0J99_03705 | BBPC_0712 | 6-phosphogluconolactonase                    | Pentose phosphate pathway                                                                                                                                                    |
| L0J99_03745 | BBPC_0720 | putative B-exosaminidase                     | Amino sugar and nucleotide sugar metabolism<br>beta-Lactam resistance                                                                                                        |
| L0J99_03770 | BBPC_0725 | Enolase                                      | Glycolysis / Gluconeogenesis<br>Methane metabolism<br>RNA degradation<br>Messenger RNA biogenesis                                                                            |
| L0J99_03940 | BBPC_0760 | pyruvate kinase                              | Glycolysis / Gluconeogenesis<br>Pyruvate metabolism<br>Membrane trafficking                                                                                                  |

|             |           |                                                           |                                                                                                                         |
|-------------|-----------|-----------------------------------------------------------|-------------------------------------------------------------------------------------------------------------------------|
| L0J99_03950 | BBPC_0762 | 3-hydroxyacyl-CoA dehydrogenase                           | Butanoate metabolism<br>Phenylalanine metabolism<br>Benzoate degradation                                                |
| L0J99_03955 | BBPC_0763 | conserved hypothetical protein                            | Glycolysis / Gluconeogenesis                                                                                            |
| L0J99_04015 | BBPC_0784 | xylulose-5-phosphate/fructose-6-phosphate phosphoketolase | Pentose phosphate pathway                                                                                               |
| L0J99_04020 | BBPC_0785 | phosphate acetyltransferase                               | Pyruvate metabolism<br>Propanoate metabolism<br>Methane metabolism<br>Taurine and hypotaurine metabolism                |
| L0J99_04025 | BBPC_0786 | acetate kinase                                            | Pyruvate metabolism<br>Propanoate metabolism<br>Methane metabolism<br>Taurine and hypotaurine metabolism                |
| L0J99_04170 | BBPC_0815 | glucose-1-phosphate adenylyltransferase                   | Starch and sucrose metabolism<br>Amino sugar and nucleotide sugar metabolism                                            |
| L0J99_04220 | BBPC_0824 | NAD(P) transhydrogenase alpha-1 subunit                   | Nicotinate and nicotinamide metabolism                                                                                  |
| L0J99_04225 | BBPC_0825 | NAD(P) transhydrogenase alpha-2 subunit                   | Nicotinate and nicotinamide metabolism                                                                                  |
| L0J99_04230 | BBPC_0826 | NAD(P) transhydrogenase beta subunit                      | Nicotinate and nicotinamide metabolism                                                                                  |
| L0J99_04355 | BBPC_0852 | glutamate synthase beta subunit                           | Nitrogen metabolism<br>Alanine, aspartate, and glutamate metabolism                                                     |
| L0J99_04365 | BBPC_0854 | putative glycosyltransferase                              | Starch and sucrose metabolism<br>Glycosyltransferases                                                                   |
| L0J99_04520 | BBPC_0884 | isocitrate dehydrogenase                                  | Citrate cycle (TCA cycle)<br>Glutathione metabolism                                                                     |
| L0J99_04585 | BBPC_0897 | putative phosphoglycerate mutase                          | Glycolysis / Gluconeogenesis<br>Methane metabolism<br>Glycine, serine, and threonine metabolism<br>Membrane trafficking |

|             |           |                                             |       |                                                                                                                                                                                                                                                                                                 |
|-------------|-----------|---------------------------------------------|-------|-------------------------------------------------------------------------------------------------------------------------------------------------------------------------------------------------------------------------------------------------------------------------------------------------|
| L0J99_05025 | BBPC_0936 | triosephosphate isomerase                   |       | Glycolysis / Gluconeogenesis<br>Fructose and mannose metabolism<br>Inositol phosphate metabolism                                                                                                                                                                                                |
| L0J99_05065 | BBPC_0944 | transaldolase                               |       | Pentose phosphate pathway                                                                                                                                                                                                                                                                       |
| L0J99_05070 | BBPC_0945 | transketolase                               |       | Pentose phosphate pathway                                                                                                                                                                                                                                                                       |
| L0J99_05230 | BBPC_0961 | UTP-glucose-1-phosphate uridylyltransferase |       | Pentose and glucuronate interconversions<br>Galactose metabolism<br>Starch and sucrose metabolism<br>Amino sugar and nucleotide sugar metabolism                                                                                                                                                |
| L0J99_05275 | BBPC_0968 | succinyl-CoA synthase alpha subunit         |       | Citrate cycle (TCA cycle)<br>Propanoate metabolism<br>C5-Branched dibasic acid metabolism                                                                                                                                                                                                       |
| L0J99_05355 | BBPC_0984 | ribulose-phosphate 3-epimerase              |       | Pentose phosphate pathway<br>Pentose and glucuronate interconversions                                                                                                                                                                                                                           |
| L0J99_05705 | BBPC_1057 | dihydrolipoamide dehydrogenase              |       | Glycolysis / Gluconeogenesis<br>Citrate cycle (TCA cycle)<br>Pyruvate metabolism<br>Glyoxylate and dicarboxylate metabolism<br>Propanoate metabolism<br>Glycine, serine, and threonine metabolism<br>Valine, leucine, and isoleucine degradation<br>Lysine degradation<br>Tryptophan metabolism |
| L0J99_05770 | BBPC_1070 | putative glucokinase                        |       | Glycolysis / Gluconeogenesis<br>Amino sugar and nucleotide sugar metabolism                                                                                                                                                                                                                     |
| L0J99_05970 | BBPC_1111 | formate acetyltransferase                   |       | Pyruvate metabolism<br>Propanoate metabolism<br>Butanoate metabolism                                                                                                                                                                                                                            |
| L0J99_07615 | BBPC_1372 | putative glucosidase                        | beta- | Starch and sucrose metabolism<br>Cyanoamino acid metabolism                                                                                                                                                                                                                                     |
| L0J99_07635 | BBPC_1376 | putative glucosidase                        | beta- | Starch and sucrose metabolism<br>Cyanoamino acid metabolism                                                                                                                                                                                                                                     |



|             |           |                                |                                                                                                                                      |
|-------------|-----------|--------------------------------|--------------------------------------------------------------------------------------------------------------------------------------|
| L0J99_07625 | BBPC_1374 | glycerate kinase               | Glyoxylate and dicarboxylate metabolism<br>Glycerolipid metabolism<br>Glycine, serine, and threonine metabolism                      |
| L0J99_08650 | BBPC_1580 | ATP synthase beta subunit      | Oxidative phosphorylation<br>Photosynthesis proteins                                                                                 |
| L0J99_08660 | BBPC_1582 | ATP synthase alpha subunit     | Oxidative phosphorylation<br>Photosynthesis proteins                                                                                 |
| L0J99_08750 | BBPC_1592 | putative amylase               | Starch and sucrose metabolism                                                                                                        |
| L0J99_08755 | BBPC_1593 | inorganic pyrophosphatase      | Oxidative phosphorylation                                                                                                            |
| L0J99_09250 | BBPC_1743 | beta-galactosidase             | Galactose metabolism<br>Sphingolipid metabolism<br>Other glycan degradation                                                          |
| L0J99_09385 | BBPC_1743 | beta-galactosidase             | Galactose metabolism<br>Sphingolipid metabolism<br>Other glycan degradation                                                          |
| L0J99_09685 | BBPC_1743 | beta-galactosidase             | Galactose metabolism<br>Sphingolipid metabolism<br>Other glycan degradation                                                          |
| L0J99_09350 | BBPC_1761 | glycosyl hydrolase             | Starch and sucrose metabolism<br>Cyanoamino acid metabolism                                                                          |
| L0J99_09250 | BBPC_1768 | beta-galactosidase             | Galactose metabolism<br>Sphingolipid metabolism<br>Other glycan degradation                                                          |
| L0J99_09385 | BBPC_1768 | beta-galactosidase             | Galactose metabolism<br>Sphingolipid metabolism<br>Other glycan degradation                                                          |
| L0J99_09685 | BBPC_1768 | beta-galactosidase             | Galactose metabolism<br>Sphingolipid metabolism<br>Other glycan degradation                                                          |
| L0J99_09475 | BBPC_1786 | putative thioredoxin reductase | Seleno compound metabolism                                                                                                           |
| L0J99_09555 | BBPC_1670 | alpha-galactosidase            | Galactose metabolism<br>Glycerolipid metabolism<br>Sphingolipid metabolism                                                           |
| L0J99_09650 | BBPC_1689 | glucokinase                    | Glycolysis / Gluconeogenesis<br>Galactose metabolism<br>Starch and sucrose metabolism<br>Amino sugar and nucleotide sugar metabolism |

|             |           |                    |                          |            |
|-------------|-----------|--------------------|--------------------------|------------|
| L0J99_09250 | BBPC_1695 | beta-galactosidase | Galactose                | metabolism |
|             |           |                    | Sphingolipid             | metabolism |
|             |           |                    | Other glycan degradation |            |
| L0J99_09385 | BBPC_1695 | beta-galactosidase | Galactose                | metabolism |
|             |           |                    | Sphingolipid             | metabolism |
|             |           |                    | Other glycan degradation |            |
| L0J99_09685 | BBPC_1695 | beta-galactosidase | Galactose                | metabolism |
|             |           |                    | Sphingolipid             | metabolism |
|             |           |                    | Other glycan degradation |            |
| L0J99_09460 | BBPC_1782 | oligo-1            | Galactose                | metabolism |
|             |           |                    | Starch and sucrose       |            |
|             |           |                    | metabolism               |            |
| L0J99_09945 | BBPC_1782 | oligo-1            | Galactose                | metabolism |
|             |           |                    | Starch and sucrose       |            |
|             |           |                    | metabolism               |            |
| L0J99_09840 | BBPC_1725 | glycosyl hydrolase | Galactose                | metabolism |
|             |           |                    | Starch and sucrose       |            |
|             |           |                    | metabolism               |            |
| L0J99_09880 | BBPC_1736 | putative alpha-1   | Galactose                | metabolism |
|             |           |                    | Starch and sucrose       |            |
|             |           |                    | metabolism               |            |

---
